# Supplementary material for: Breakfast Consumption Suppresses Appetite but Does Not Increase Daily Energy Intake or Physical Activity Energy Expenditure When Compared with Breakfast Omission in Adolescent Girls Who Habitually Skip Breakfast: A 7-Day Randomised Crossover Trial
Source: MDPI journal article supplement (doi:10.3390/nu13124261), 2021-11-26
Supplement: s1 [file s1]

**Supplemental Table S1.** Breakfast choices of adolescent girls who participated in randomised crossover trial comparing seven days of daily breakfast consumption (BC) with seven days of daily breakfast omission (BO)<sup>1</sup>

|                                                                              | Breakfast options                                   | <i>n</i> for PA<br>analyses<br>sample | <i>n</i> for dietary<br>analyses<br>sample | <i>n</i> for VAS<br>analyses<br>sample |
|------------------------------------------------------------------------------|-----------------------------------------------------|---------------------------------------|--------------------------------------------|----------------------------------------|
| Breakfast cereal<br>with semi-<br>skimmed (1.8%<br>fat) milk<br>(compulsory) | Swiss Style Muesli<br>(no added sugar) <sup>2</sup> | 6                                     | 2                                          | 4                                      |
|                                                                              | Weetabix <sup>3</sup>                               | 4                                     | 4                                          | 4                                      |
|                                                                              | All-Bran Original <sup>4</sup>                      | 5                                     | 5                                          | 3                                      |
| Raisins (optional) <sup>2</sup>                                              |                                                     | 3                                     | 2                                          | 2                                      |
| Beverage<br>(compulsory)                                                     | Orange juice <sup>2</sup>                           | 4                                     | 4                                          | 3                                      |
|                                                                              | Apple juice <sup>2</sup>                            | 11                                    | 7                                          | 8                                      |

<sup>1</sup>Total *n*=15 for physical activity (PA) analyses; total *n*=11 for dietary analyses; total *n*=11 for visual analogue scale (VAS) analyses. BC was the consumption of a standardised breakfast with an energy content equating to 25% of individual resting metabolic rate before 09:00 for seven consecutive days; BO was the abstinence from all energy-providing nutrients until at least 10:30 for seven consecutive days.

<sup>2</sup>Tesco, UK.

<sup>3</sup>Weetabix Limited, UK.

<sup>4</sup>Kelloggs, UK.
